# Supplementary material for: Single-composition white-emitting NaSrBO3:Ce3+,Sm3+,Tb3+phosphors for NUV light-emitting diodes
Source: Royal Society of Chemistry journal article supplement (doi:10.1039/c5tc00832h), 2015-01-01
Supplement: c5tc00832h1.pdf [file c5tc00832h1.pdf]

## Supporting Information

### **Single-Composition White-Emitting NaSrBO<sub>3</sub>:Ce<sup>3+</sup>, Sm<sup>3+</sup>, Tb<sup>3+</sup> Phosphors for NUV Light-Emitting Diodes**

Ming Xin,<sup>ab</sup> Datao Tu,<sup>b</sup> Haomiao Zhu,<sup>b</sup> Wenqin Luo,<sup>b</sup> Zhuguang Liu,<sup>b</sup> Ping Huang,<sup>b</sup> Renfu Li,<sup>b</sup> Yongge Cao<sup>b</sup> and  
Xueyuan Chen<sup>ab\*</sup>

<sup>a</sup> *College of Chemistry, Fuzhou University, Fuzhou, Fujian 350116, China.*

<sup>b</sup> *Key Laboratory of Optoelectronic Materials Chemistry and Physics, Fujian Institute of Research on the Structure of Matter, Chinese Academy of Sciences, Fuzhou, Fujian 350002, China.*

\*Corresponding author, E-mail: [xchen@fjirsm.ac.cn](mailto:xchen@fjirsm.ac.cn)

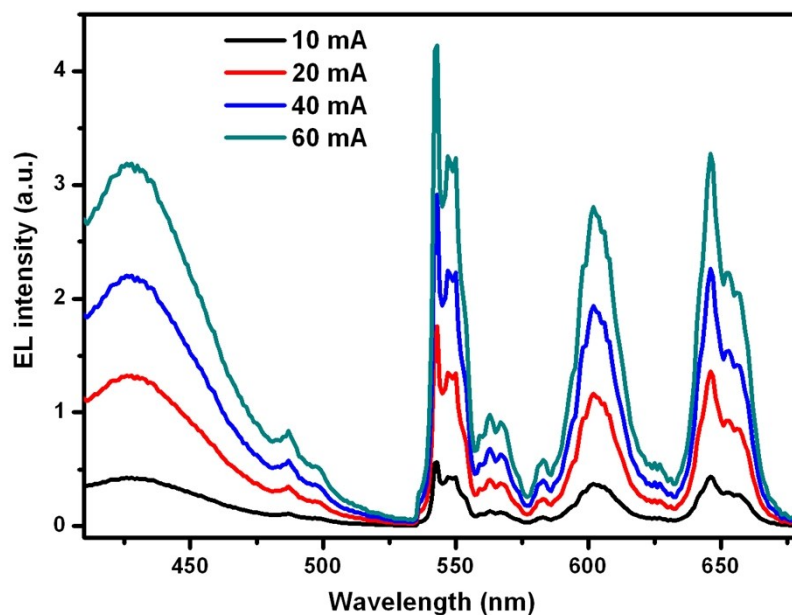

**Fig. S1** Electroluminescence (EL) spectra of the fabricated white light emitting diodes (WLED) device under various drive currents. The fabricated WLED device were operated at 3.0 V with various drive currents of 10, 20, 40 and 60 mA, respectively. The EL intensity increases with the increased driven current, whereas the EL pattern remains essentially unchanged.

**Table S1** Photoelectric parameters for the fabricated WLED device under various drive currents. With the increased drive current, the correlated color temperature (CCT) increases slightly from 6731 to 7062 K while the color rendering index (Ra) remains around 80. The slight variation of the chromaticity coordinate, merely 0.006 for CIE-x and 0.004 for CIE-y, respectively, confirms the negligible color fluctuation in the device.

| Current (mA) | CCT (K) | <u>Chromaticity coordinate</u> |       | Ra   |
|--------------|---------|--------------------------------|-------|------|
|              |         | x                              | y     |      |
| 10           | 6731    | 0.311                          | 0.314 | 80.1 |
| 20           | 6780    | 0.309                          | 0.311 | 80.0 |
| 40           | 6993    | 0.306                          | 0.310 | 79.5 |
| 60           | 7062    | 0.305                          | 0.310 | 79.5 |
